# Supplementary material
Source: PubMed Central journal article supplement (PMC10025119)

iScience, Volume 26

## **Supplemental information**

### **Mutating novel interaction sites in NRP1 reduces SARS-CoV-2 spike protein internalization**

**Debjani Pal, Kuntal De, Timothy B. Yates, Jaydeep Kolape, and Wellington Muchero**



25 Figure(s). S1 to S6

26

27 **Fig. S1: Immunodetection shows no difference in the cellular localization of mutant NRP1**  
28 **compared to wild-type NRP1, Related to Fig. 1.** Vero-E6 cells were transiently transfected with  
29 indicated N-terminal HA tagged NRP1 constructs for 30 hr. Detection of ZO-1 (red) and HA-  
30 antibody (green) were done as described in “Methods” without permeabilizing the cells. Images  
31 were acquired using Zeiss LSM 710 confocal microscope outfitted with a 63x objective. Scale bars  
32 represent 20  $\mu\text{m}$ .

33

34 **Fig. S2: Mutation in NRP1 impacts on interaction between NRP1 and SARS-CoV-2 spike**  
35 **protein, Related to Fig. 2.** 293T and Vero-E6 cells were transfected with the indicated HA-NRP1  
36 (wild type and mutants) and Flag-SARS-CoV-2-S1<sup>493-685</sup> constructs. Cells were lysed 30 hr post  
37 transfection, and the interaction between HA-NRP1 and Flag-SARS-CoV-2-S1<sup>493-685</sup> was  
38 analyzed. The relative amount of spike protein pulled down with NRP1 was normalized directly  
39 to immunoprecipitated NRP1 (a and c) or to the total amount of spike protein expressed in the cells  
40 and then to immunoprecipitated NRP1 (b and c). n = 2 biological replicates; error bars, SEM; ns,  
41 no significance; \*, p<0.05; \*\*,p < 0.005; \*\*\*, p < 0.0005 were calculated by one way ANOVA.

42

43 **Fig. S3: SARS-CoV-2 S1<sup>493-685</sup> colocalization with NRP1 is cysteine dependent in HeLa cells,**  
44 **Related to Fig. 3.** (a) Representative images of colocalization studies between Flag-SARS-CoV-  
45 2-S1<sup>493-685</sup> and different HA-NRP1 constructs by confocal immunofluorescence microscopy in

46 HeLa cells. The cells were transiently transfected with Flag-SARS-CoV-2-S1<sup>493-685</sup> and different  
47 mutants of HA-NRP1 as indicated. 30 hours post-transfection cells were fixed, mounted and  
48 protein expression patterns were visualized using a Zeiss LSM 710 confocal microscope. Scale  
49 bars represent 50  $\mu\text{m}$ . The images shown are representative from three independent biological  
50 experiments (average 100 cells were observed per experimental condition per replicate). (b)  
51 Quantification of the HeLa cells expressing Flag-SARS-CoV-2-S1<sup>493-685</sup> in the presence of  
52 indicated HA-NRP1 constructs. Data are represented as mean  $\pm$  SD,  $n = 3$  (average 100 cells were  
53 observed for each condition per experiment); ns, no significance; \*,  $p < 0.05$ ; \*\*,  $p < 0.005$ ; \*\*\*,  $p$   
54  $< 0.0005$  were calculated by one-way ANOVA.

55

56 **Fig. S4: Detection of interaction of NRP1 and SARS-CoV-2 spike protein in cells, Related to**  
57 **Fig. 3.** Quantification of the Vero-E6 cells expressing Flag-SARS-CoV-2-S1<sup>493-685</sup> in the presence  
58 of indicated HA-NRP1 corresponds to Fig 3. Data are represented as mean  $\pm$  SD,  $n = 3$  (average  
59 100 cells were observed for each condition per experiment), and \*,  $p < 0.05$ ; \*\*,  $p < 0.005$ ; \*\*\*,  $p <$   
60  $0.0005$ ; and \*\*\*\*,  $p < 0.0001$  were calculated by one-way ANOVA.

61

62 **Fig. S5: NRP1 interaction with co-receptor Plexin-A1 is cysteine dependent, Related to**  
63 **STAR Methods.** (a) 293T cells were transfected with HA-NRP1-WT or HA-NRP1-4Cys-4Ala  
64 together with Flag-Plexin-A1. Cell lysates were then immunoprecipitated with anti-Flag antibody  
65 and blotted with anti-HA or anti-Flag antibody. (b) Quantification of the band intensities ( $n = 2$ ).  
66 Immunoprecipitated HA-NRP1 band intensities were normalized to the respective Flag-Plexin-A1  
67 IP bands and then further normalized to HA-NRP1-WT control. Data are represented as mean  $\pm$

68 SD, and \*\*\*,  $p < 0.0005$  (Student's t test). (c) Representative images of colocalization studies  
69 between Flag-tagged Plexin-A1 protein and indicated HA-NRP1 constructs by confocal  
70 immunofluorescence microscopy in HeLa cells. The cells were transiently transfected with Flag-  
71 Plexin-A1 and different constructs of HA-NRP1 as indicated. 30 hours post-transfection cells were  
72 fixed, mounted and protein expression patterns were visualized using a Zeiss LSM 710 confocal  
73 microscope. Scale bars represent 50  $\mu\text{m}$ . The images shown are representative from three  
74 independent biological experiments (average 100 cells were observed per experimental condition  
75 per replicate).

76

77 **Fig. S6: Attenuated colocalization of NRP1 mutant with endolysosomal marker LAMP1,**  
78 **Related to STAR Methods.** Representative image of Vero-E6 cells transfected with different HA-  
79 NRP1 constructs (both WT and 4Cys-4Ala) and then coimmunostained with DAPI (blue),  
80 antibody specific to HA-tagged NRP1 protein (HA, red) and anti-LAMP1 (green). Cells were  
81 visualized using a Zeiss LSM 710 confocal microscope outfitted with a 63x objective. Scale bars  
82 represent 10  $\mu\text{m}$ .

83

84

85

86

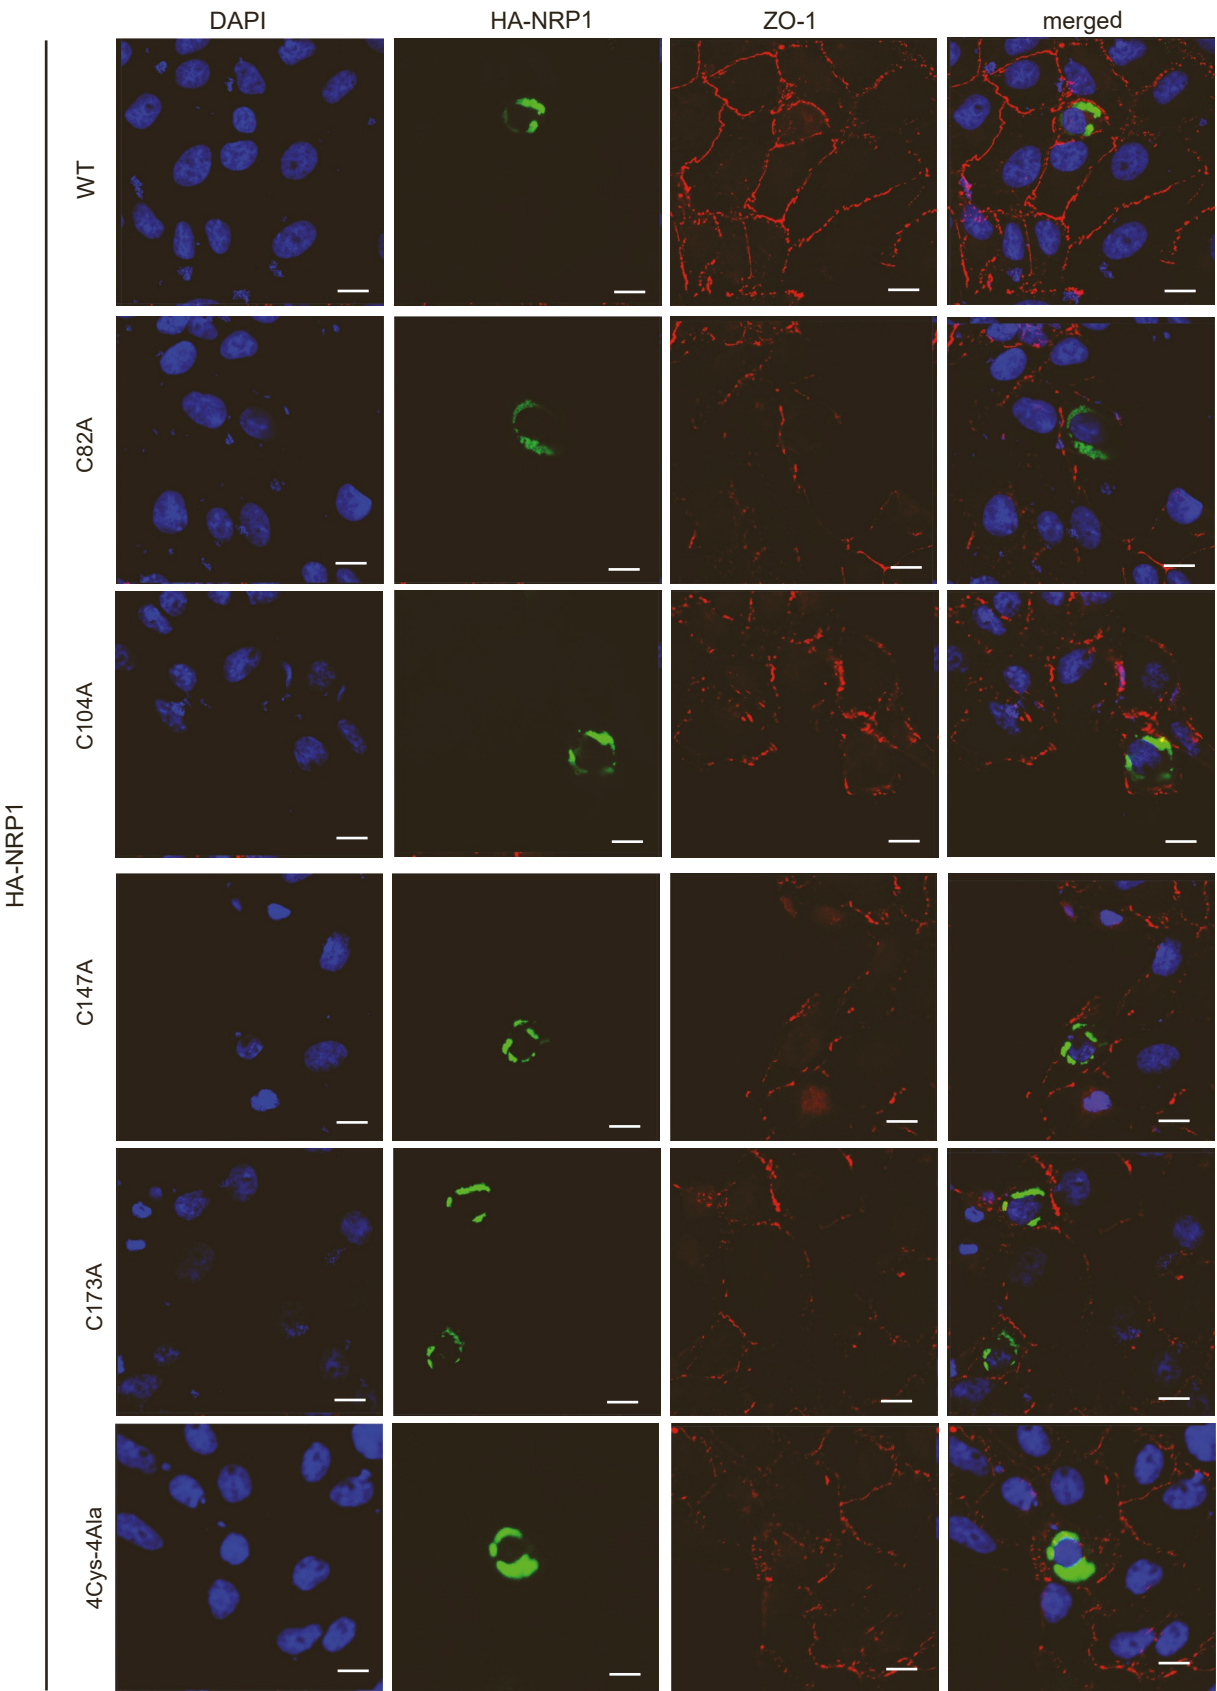

Vero-E6

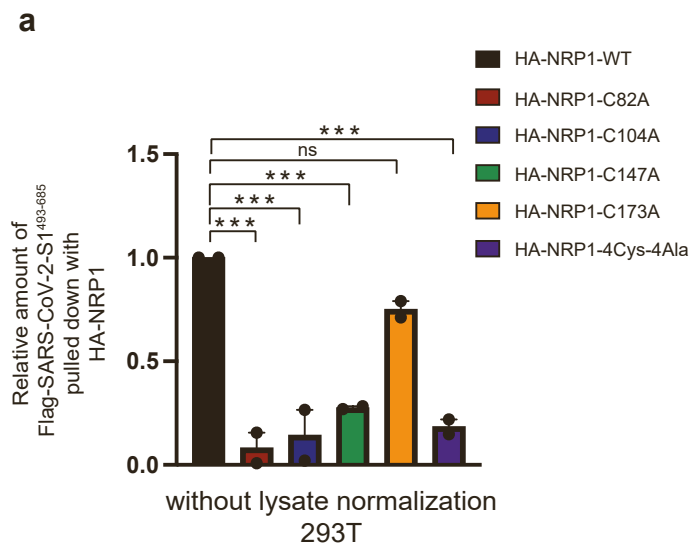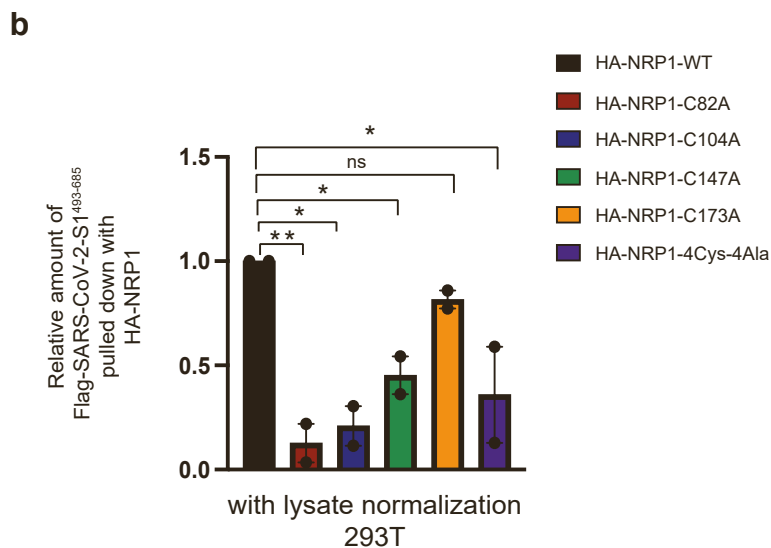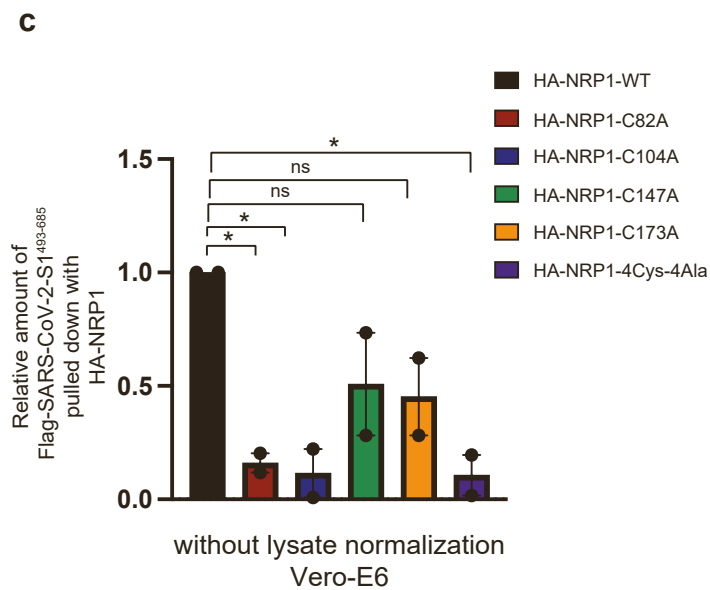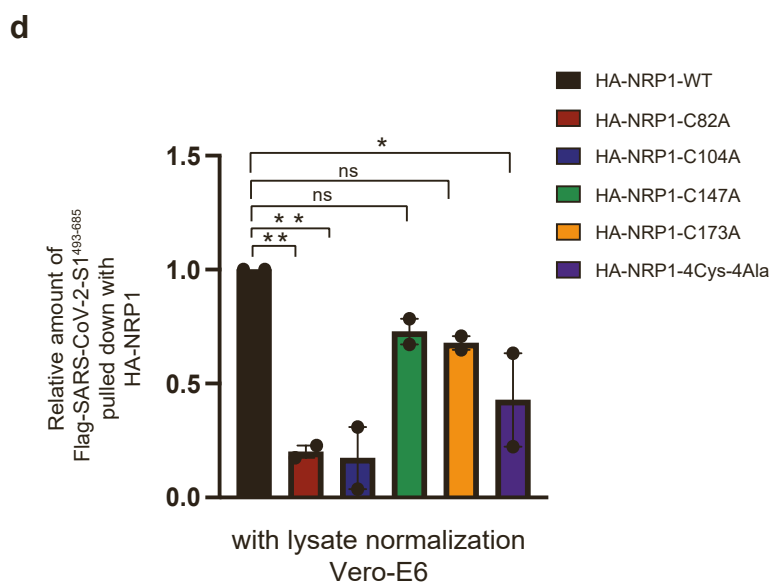

**a**

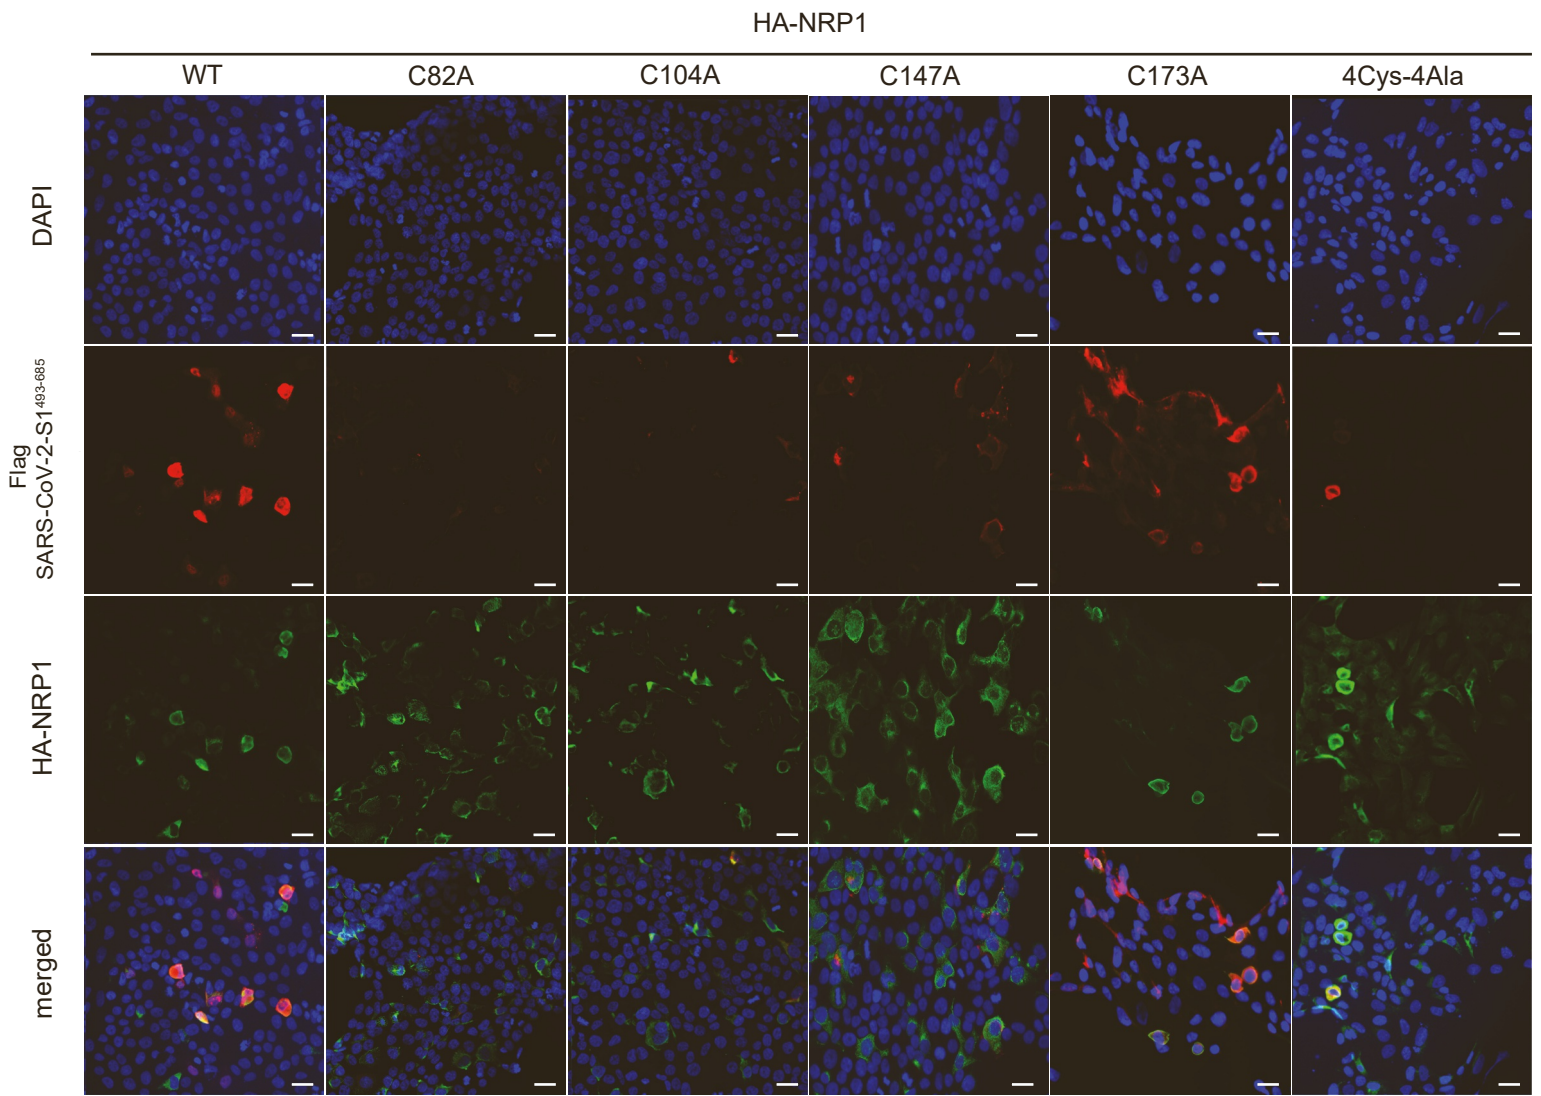

HeLa

**b**

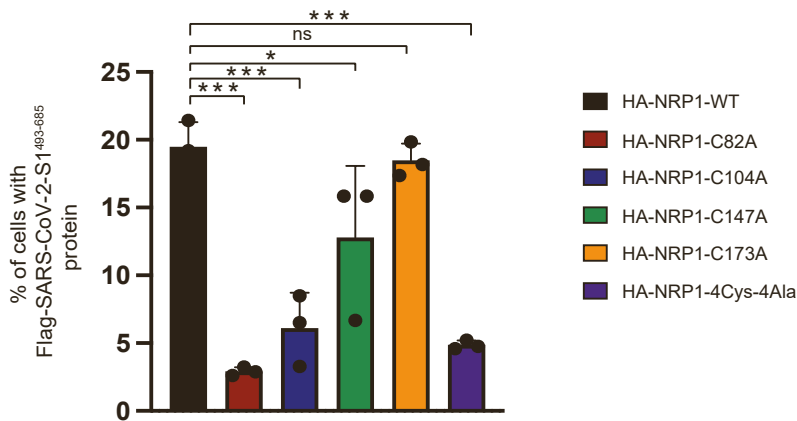



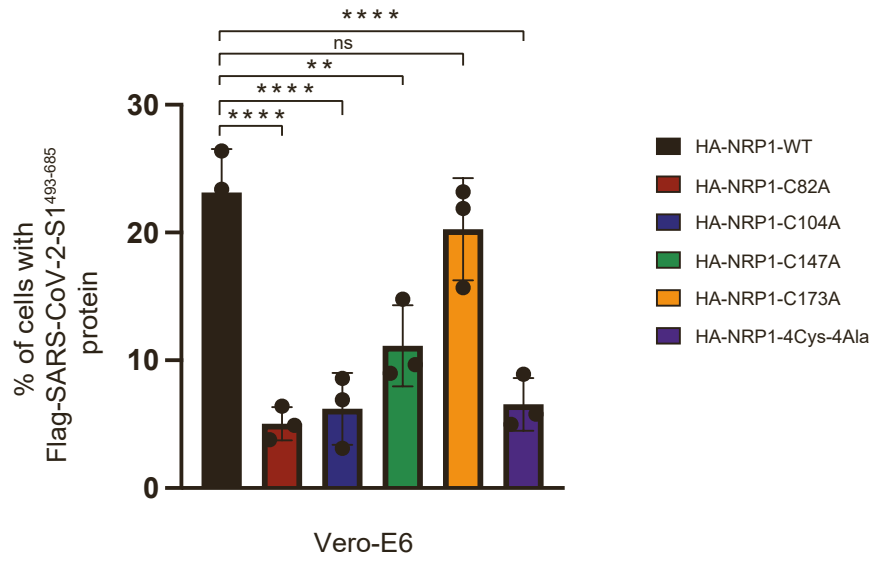

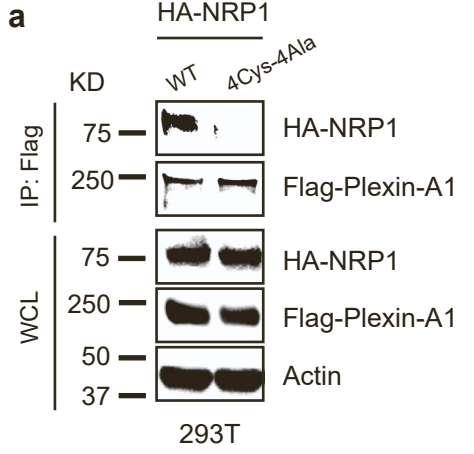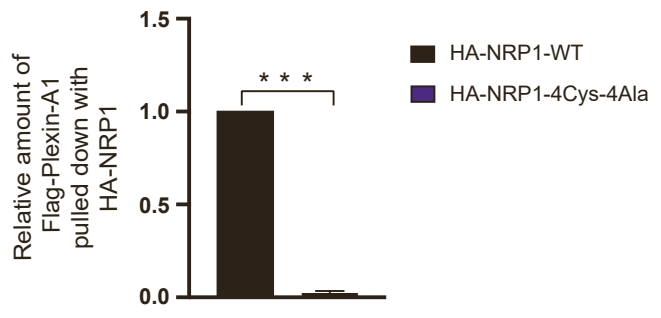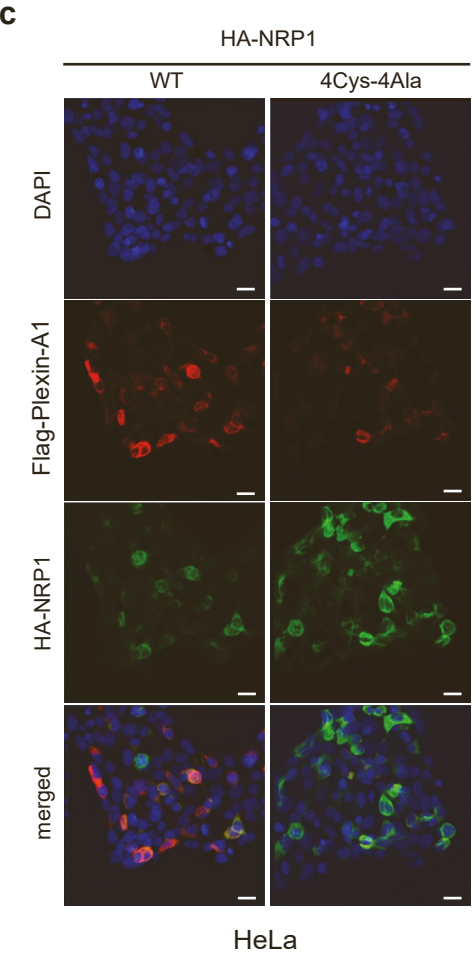

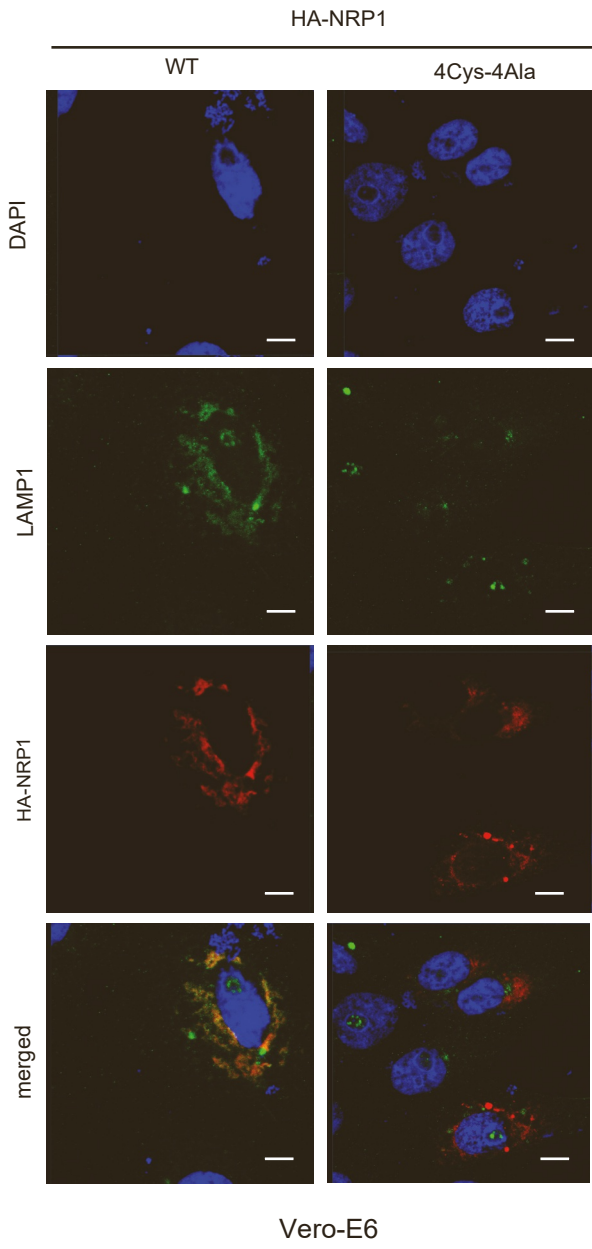

Supplement: mmc1.pdf [file mmc1.pdf]
